# Supplementary material for: An Interacting Quantum Atoms (IQA) and Relative Energy Gradient (REG) Analysis of the Anomeric Effect
Source: MDPI journal article supplement (doi:10.3390/molecules27155003), 2022-08-06
Supplement: s1 [file s1]

# Supporting Information

## An Interacting Quantum Atoms (IQA) and Relative Energy Gradient (REG) Analysis of the Anomeric Effect

Danish Khan, Leonardo J. Duarte and Paul L. A. Popelier\*

### Content:

**Table S1.** REG values of all interactions in DMM.

**Table S2.** REG values of all interactions in the FTHP-R isomer.

**Table S3.** REG values of all interactions in the FTHP-S isomer.

**Table S1.** REG values of all interactions in DMM.

| Segment 1    |       |      | Segment 2    |      |      | Segment 3    |      |      |
|--------------|-------|------|--------------|------|------|--------------|------|------|
| Contribution | REG   | R    | Contribution | REG  | R    | Contribution | REG  | R    |
| VCI-C1,O4    | 11.77 | 0.99 | VCI-O4,C6    | 0.79 | 0.99 | VCI-C1,O5    | 1.08 | 1.00 |
| VCI-C1,O5    | 11.34 | 0.98 | VCI-O5,C10   | 0.79 | 0.99 | VCI-C1,O4    | 1.05 | 1.00 |
| VCI-C1,H2    | 3.22  | 0.96 | Eintra-C10   | 0.71 | 0.99 | Eintra-C10   | 0.50 | 0.97 |
| VCI-C1,H3    | 3.22  | 0.96 | Eintra-C6    | 0.70 | 0.99 | Eintra-C6    | 0.50 | 0.97 |
| VCI-O5,C6    | 2.92  | 0.99 | Eintra-C1    | 0.58 | 0.72 | VxC-O4,O5    | 0.22 | 0.99 |
| VCI-O4,C10   | 2.91  | 0.99 | VCI-C1,O5    | 0.33 | 0.60 | VCI-C6,C10   | 0.20 | 0.95 |
| Eintra-H3    | 1.16  | 0.99 | VCI-O5,H8    | 0.33 | 1.00 | VCI-O5,H8    | 0.14 | 0.92 |
| Eintra-H2    | 1.16  | 0.99 | VCI-O4,H12   | 0.33 | 1.00 | VCI-O4,H12   | 0.13 | 0.91 |
| VxC-O5,C6    | 1.04  | 0.97 | VCI-C1,O4    | 0.33 | 0.58 | VxC-O5,H12   | 0.10 | 0.88 |
| VxC-O4,C10   | 1.02  | 0.97 | VCI-H2,O5    | 0.29 | 0.93 | Eintra-H3    | 0.09 | 0.99 |
| VxC-H3,H9    | 0.96  | 0.96 | VCI-H3,O4    | 0.29 | 0.93 | Eintra-H2    | 0.09 | 0.99 |
| VxC-H2,H13   | 0.96  | 0.96 | VCI-H3,O5    | 0.28 | 0.92 | VCI-O4,H8    | 0.09 | 0.84 |
| VCI-H3,C6    | 0.92  | 0.97 | VCI-H2,O4    | 0.28 | 0.92 | VxC-O4,H8    | 0.09 | 0.75 |
| VCI-H2,C10   | 0.92  | 0.97 | VxC-O4,H8    | 0.27 | 0.95 | Eintra-H13   | 0.08 | 0.89 |
| VCI-H3,C10   | 0.85  | 0.96 | VxC-O5,H12   | 0.27 | 0.95 | Eintra-H9    | 0.08 | 0.90 |
| VCI-H2,C6    | 0.85  | 0.96 | VCI-O4,H8    | 0.23 | 0.99 | VxC-C1,O5    | 0.08 | 0.98 |
| VCI-C6,H8    | 0.67  | 0.98 | VCI-O5,H12   | 0.23 | 0.99 | VxC-C1,O4    | 0.07 | 0.97 |
| VCI-C10,H12  | 0.66  | 0.98 | VxC-C1,O4    | 0.16 | 0.99 | VxC-O4,C6    | 0.07 | 0.88 |
| VxC-C1,O4    | 0.60  | 1.00 | VxC-C1,O5    | 0.16 | 1.00 | VxC-O5,C10   | 0.07 | 0.89 |
| VCI-O4,H13   | 0.57  | 0.93 | VxC-H3,H13   | 0.14 | 0.89 | VCI-O5,H12   | 0.06 | 0.90 |
| VxC-H3,C6    | 0.57  | 0.90 | VxC-O4,C6    | 0.14 | 0.86 | VxC-C6,H7    | 0.05 | 1.00 |
| VxC-H2,C10   | 0.57  | 0.90 | VxC-O5,C10   | 0.14 | 0.86 | VxC-C10,H11  | 0.05 | 1.00 |
| VCI-O5,H9    | 0.56  | 0.94 | VxC-H2,H9    | 0.14 | 0.89 | VxC-H2,H9    | 0.05 | 0.92 |
| VCI-O4,H11   | 0.56  | 0.99 | VCI-C10,H11  | 0.12 | 0.99 | VxC-H3,H13   | 0.05 | 0.92 |
| VCI-O5,H7    | 0.56  | 0.99 | VCI-C6,H7    | 0.12 | 0.99 | VCI-O4,H9    | 0.05 | 0.70 |
| VxC-C1,O5    | 0.54  | 1.00 | VxC-C6,H8    | 0.09 | 0.83 | VCI-O5,H13   | 0.05 | 0.69 |
| Eintra-C10   | 0.52  | 0.96 | VxC-C10,H12  | 0.09 | 0.83 | VxC-O4,C10   | 0.05 | 0.92 |
| Eintra-C6    | 0.46  | 0.97 | VCI-O4,H13   | 0.08 | 0.98 | VxC-O5,C6    | 0.05 | 0.92 |
| Eintra-H8    | 0.37  | 0.97 | VCI-O5,H9    | 0.08 | 0.98 | VxC-H8,H12   | 0.04 | 0.33 |
| Eintra-H12   | 0.37  | 0.97 | Eintra-H3    | 0.08 | 0.76 | Eintra-H11   | 0.04 | 0.99 |
| VCI-C1,H8    | 0.35  | 0.96 | Eintra-H2    | 0.08 | 0.76 | Eintra-H7    | 0.04 | 0.99 |
| VCI-C1,H12   | 0.35  | 0.96 | VxC-C10,H11  | 0.07 | 1.00 | VCI-C1,H2    | 0.04 | 0.92 |
| VxC-C1,H9    | 0.30  | 1.00 | VxC-C6,H7    | 0.07 | 1.00 | VxC-C1,C10   | 0.04 | 0.96 |
| VxC-C1,H13   | 0.30  | 1.00 | VCI-O4,H9    | 0.07 | 0.98 | VxC-C1,C6    | 0.04 | 0.96 |
| VxC-H2,H3    | 0.29  | 0.97 | VCI-O5,H13   | 0.07 | 0.98 | VCI-C1,H3    | 0.04 | 0.92 |
| VxC-C1,C10   | 0.26  | 0.99 | Eintra-H11   | 0.05 | 0.98 | VCI-C10,H11  | 0.04 | 0.63 |
| VxC-C1,C6    | 0.26  | 1.00 | Eintra-H7    | 0.05 | 0.98 | VCI-C6,H7    | 0.03 | 0.64 |
| VCI-C6,C10   | 0.23  | 0.87 | VxC-C1,H13   | 0.05 | 0.98 | VxC-H3,C10   | 0.03 | 0.81 |
| VxC-H3,O4    | 0.16  | 0.98 | VxC-C1,H9    | 0.05 | 0.98 | VxC-H2,C6    | 0.03 | 0.81 |
| VxC-H2,O5    | 0.15  | 0.98 | VCI-C1,H11   | 0.05 | 0.91 | VxC-C1,H9    | 0.03 | 0.95 |
| VCI-H2,H3    | 0.15  | 0.94 | VCI-C1,H7    | 0.05 | 0.91 | VxC-C1,H13   | 0.03 | 0.94 |
| VCI-O5,H11   | 0.13  | 1.00 | VxC-C1,H2    | 0.04 | 0.48 | VCI-O5,H9    | 0.02 | 0.22 |
| VCI-O4,H7    | 0.13  | 1.00 | VxC-C1,H3    | 0.04 | 0.48 | VCI-O4,H13   | 0.02 | 0.21 |
| VCI-H8,C10   | 0.13  | 0.97 | VxC-H3,C6    | 0.04 | 0.99 | VCI-H7,C10   | 0.02 | 0.92 |

|             |      |       |             |      |       |             |      |       |
|-------------|------|-------|-------------|------|-------|-------------|------|-------|
| VCI-C6,H12  | 0.13 | 0.97  | VxC-H2,C10  | 0.04 | 0.99  | VCI-C6,H11  | 0.02 | 0.92  |
| VxC-O4,H12  | 0.12 | 0.98  | VCI-O5,H11  | 0.04 | 0.92  | VCI-H2,C10  | 0.02 | 0.92  |
| VxC-O5,H8   | 0.12 | 0.98  | VCI-O4,H7   | 0.04 | 0.92  | VCI-H3,C6   | 0.02 | 0.92  |
| VCI-H3,H7   | 0.08 | 0.99  | VxC-H3,O5   | 0.03 | 0.98  | VxC-C10,H12 | 0.02 | 0.70  |
| VCI-H2,H11  | 0.08 | 0.99  | VxC-H2,O4   | 0.03 | 0.98  | VxC-C6,H8   | 0.02 | 0.70  |
| VxC-O5,C10  | 0.08 | 0.85  | VxC-H8,H12  | 0.01 | 0.64  | VCI-H3,C10  | 0.01 | 0.87  |
| VxC-O4,C6   | 0.08 | 0.84  | VxC-H8,C10  | 0.01 | 0.73  | VCI-H2,C6   | 0.01 | 0.87  |
| VCI-H2,H9   | 0.06 | 0.98  | VxC-C6,H12  | 0.01 | 0.73  | VxC-H3,C6   | 0.01 | 0.93  |
| VCI-H3,H13  | 0.06 | 0.98  | VxC-O5,H11  | 0.01 | 0.86  | VxC-H2,C10  | 0.01 | 0.93  |
| VxC-C10,H11 | 0.06 | 0.98  | VxC-O4,H7   | 0.01 | 0.86  | VCI-H2,H3   | 0.01 | 0.97  |
| VxC-C6,H7   | 0.05 | 0.97  | VxC-H2,O5   | 0.00 | 0.35  | VxC-C1,H12  | 0.01 | 0.92  |
| VCI-H3,H11  | 0.05 | 0.91  | VxC-H3,O4   | 0.00 | 0.32  | VCI-H9,H12  | 0.01 | 0.96  |
| VCI-H2,H7   | 0.05 | 0.91  | VxC-H3,H7   | 0.00 | 0.99  | VCI-H8,H13  | 0.01 | 0.96  |
| VxC-C6,C10  | 0.04 | 0.98  | VxC-H2,H11  | 0.00 | 0.99  | VxC-O5,H11  | 0.00 | 0.92  |
| VCI-H7,H8   | 0.03 | 0.94  | VCI-H2,H13  | 0.00 | 0.74  | VxC-O4,H7   | 0.00 | 0.92  |
| VCI-H11,H12 | 0.03 | 0.95  | VCI-H3,H9   | 0.00 | 0.74  | VCI-H7,H11  | 0.00 | 0.94  |
| VxC-H7,H8   | 0.03 | 0.69  | VxC-H8,H13  | 0.00 | 1.00  | VCI-H2,H7   | 0.00 | 0.95  |
| VxC-H11,H12 | 0.03 | 0.69  | VxC-H9,H12  | 0.00 | 1.00  | VCI-H3,H11  | 0.00 | 0.95  |
| VCI-H3,H8   | 0.02 | 0.93  | VxC-C6,C10  | 0.00 | 0.44  | VxC-H11,H13 | 0.00 | 0.78  |
| VCI-H2,H12  | 0.02 | 0.93  | VxC-C6,H13  | 0.00 | 0.97  | VxC-H7,H9   | 0.00 | 0.79  |
| VxC-O5,H7   | 0.01 | 0.74  | VxC-H9,C10  | 0.00 | 0.97  | VxC-H2,H11  | 0.00 | 0.86  |
| VxC-O5,H11  | 0.01 | 0.97  | VxC-H7,H12  | 0.00 | 0.62  | VxC-H3,H7   | 0.00 | 0.86  |
| VxC-O4,H7   | 0.01 | 0.97  | VxC-H8,H11  | 0.00 | 0.62  | VCI-H2,H11  | 0.00 | 0.77  |
| VxC-O4,H11  | 0.01 | 0.70  | VxC-H7,H13  | 0.00 | 0.95  | VCI-H3,H7   | 0.00 | 0.78  |
| VCI-H8,H11  | 0.01 | 0.97  | VxC-H9,H11  | 0.00 | 0.95  | VxC-H3,H11  | 0.00 | 0.64  |
| VCI-H9,H13  | 0.01 | 0.98  | VCI-H7,H11  | 0.00 | 0.03  | VxC-H2,H7   | 0.00 | 0.63  |
| VCI-H7,H12  | 0.01 | 0.97  | VCI-H11,H13 | 0.00 | -0.05 | VxC-C1,H8   | 0.00 | 0.10  |
| VxC-C1,H12  | 0.01 | 0.25  | VCI-H7,H9   | 0.00 | -0.06 | VxC-H2,H12  | 0.00 | 0.14  |
| VxC-C1,H8   | 0.01 | 0.24  | VxC-H9,H13  | 0.00 | -0.94 | VxC-H3,H8   | 0.00 | -0.20 |
| VCI-H9,C10  | 0.01 | 0.17  | VxC-H7,H11  | 0.00 | -0.99 | VxC-H11,H12 | 0.00 | -0.16 |
| VCI-C6,H13  | 0.01 | 0.12  | VxC-O5,H13  | 0.00 | -0.36 | VxC-H7,H8   | 0.00 | -0.18 |
| VxC-H3,H8   | 0.01 | 0.78  | VxC-H11,H12 | 0.00 | -0.09 | VCI-H2,H13  | 0.00 | -0.17 |
| VxC-H2,H12  | 0.01 | 0.78  | VxC-O4,H9   | 0.00 | -0.38 | VCI-H3,H9   | 0.00 | -0.17 |
| VxC-H3,H7   | 0.00 | 0.30  | VxC-H7,H8   | 0.00 | -0.10 | VCI-H11,H13 | 0.00 | -0.09 |
| VxC-H2,H11  | 0.00 | 0.30  | VCI-H9,H13  | 0.00 | -0.91 | VCI-H7,H9   | 0.00 | -0.09 |
| VxC-H9,H12  | 0.00 | 0.98  | VCI-H8,H13  | 0.00 | -0.61 | VxC-H3,H9   | 0.00 | -0.60 |
| VxC-H8,H13  | 0.00 | 0.98  | VCI-H9,H12  | 0.00 | -0.61 | VxC-H2,H13  | 0.00 | -0.60 |
| VxC-H7,C10  | 0.00 | 0.93  | VxC-H7,C10  | 0.00 | -0.95 | VxC-H12,H13 | 0.00 | -0.22 |
| VxC-C6,H11  | 0.00 | 0.93  | VxC-C6,H11  | 0.00 | -0.95 | VxC-H8,H9   | 0.00 | -0.23 |
| VxC-H7,H11  | 0.00 | 0.91  | VCI-H3,H12  | 0.00 | -0.55 | VxC-H3,H12  | 0.00 | -0.78 |
| VCI-H9,H11  | 0.00 | -0.01 | VCI-H2,H8   | 0.00 | -0.56 | VxC-C1,H11  | 0.00 | -0.23 |
| VCI-H7,H13  | 0.00 | -0.05 | VxC-C1,H7   | 0.00 | -0.99 | VxC-H7,H11  | 0.00 | -0.98 |
| VxC-H7,H13  | 0.00 | -0.98 | VxC-C1,H11  | 0.00 | -0.99 | VxC-C1,H7   | 0.00 | -0.24 |
| VxC-H9,H11  | 0.00 | -0.98 | VCI-H7,H13  | 0.00 | -0.97 | VxC-O5,H9   | 0.00 | -0.06 |
| VxC-H8,H9   | 0.00 | -0.42 | VCI-H9,H11  | 0.00 | -0.97 | VxC-O4,H13  | 0.00 | -0.07 |
| VxC-H8,H11  | 0.00 | -0.99 | VxC-H2,H12  | 0.00 | -0.96 | VxC-H2,H8   | 0.00 | -0.68 |
| VxC-H7,H12  | 0.00 | -0.99 | VxC-H3,H8   | 0.00 | -0.96 | VCI-H7,H13  | 0.00 | -0.69 |
| VxC-H8,H12  | 0.00 | -0.94 | VxC-H2,H13  | 0.00 | -0.63 | VCI-H9,H11  | 0.00 | -0.69 |

|             |       |       |             |       |       |             |       |       |
|-------------|-------|-------|-------------|-------|-------|-------------|-------|-------|
| VxC-H12,H13 | 0.00  | -0.72 | VxC-H3,H9   | 0.00  | -0.63 | VCI-H7,H12  | 0.00  | -0.94 |
| VxC-H9,C10  | 0.00  | -0.64 | VCI-H8,H11  | -0.01 | -1.00 | VCI-H2,H12  | 0.00  | -0.93 |
| VxC-C6,H13  | 0.00  | -0.64 | VCI-H2,H11  | -0.01 | -0.85 | VxC-H9,H11  | 0.00  | -0.94 |
| VxC-H9,H13  | 0.00  | -0.99 | VCI-H3,H7   | -0.01 | -0.85 | VxC-H7,H13  | 0.00  | -0.94 |
| VCI-H8,H12  | 0.00  | -0.81 | VCI-H7,H12  | -0.01 | -1.00 | VCI-H8,H12  | 0.00  | -0.71 |
| VCI-H8,H9   | 0.00  | -0.55 | VCI-H8,H12  | -0.01 | -0.97 | VCI-C10,H13 | 0.00  | -0.04 |
| VxC-H8,C10  | 0.00  | -0.89 | VxC-H2,H7   | -0.01 | -0.96 | VCI-H8,H11  | 0.00  | -0.91 |
| VxC-C6,H12  | 0.00  | -0.89 | VxC-H3,H11  | -0.01 | -0.96 | VCI-C6,H9   | 0.00  | -0.04 |
| VxC-O5,H9   | 0.00  | -0.12 | VxC-O5,H7   | -0.01 | -0.85 | VCI-H3,H12  | 0.00  | -0.94 |
| VCI-H12,H13 | 0.00  | -0.61 | VCI-H3,H11  | -0.01 | -0.93 | VCI-H3,H8   | 0.00  | -0.90 |
| VxC-O4,H13  | -0.01 | -0.24 | VCI-H2,H7   | -0.01 | -0.93 | VCI-H9,H13  | 0.00  | -0.86 |
| VCI-H9,H12  | -0.01 | -0.99 | VxC-O4,H11  | -0.01 | -0.87 | VxC-H7,H12  | 0.00  | -0.75 |
| VCI-H8,H13  | -0.01 | -0.99 | VCI-H2,H9   | -0.01 | -0.95 | VxC-H8,H11  | 0.00  | -0.75 |
| VxC-C1,H7   | -0.01 | -1.00 | VCI-H3,H13  | -0.01 | -0.95 | VxC-H9,H13  | 0.00  | -0.89 |
| VxC-O4,H9   | -0.01 | -0.81 | Eintra-H9   | -0.01 | -0.34 | VxC-O4,H9   | 0.00  | -0.06 |
| VxC-O5,H13  | -0.01 | -0.81 | Eintra-H13  | -0.01 | -0.35 | VxC-O5,H13  | 0.00  | -0.06 |
| VxC-C1,H11  | -0.01 | -1.00 | VxC-H7,H9   | -0.01 | -0.98 | VCI-C1,H11  | 0.00  | -0.22 |
| VCI-H7,H11  | -0.01 | -0.99 | VxC-H11,H13 | -0.01 | -0.98 | VCI-H2,H8   | 0.00  | -0.91 |
| VxC-O4,H8   | -0.01 | -0.91 | VCI-H2,H12  | -0.01 | -0.99 | VxC-C10,H13 | 0.00  | -0.32 |
| VxC-O5,H12  | -0.01 | -0.91 | VCI-H3,H8   | -0.01 | -0.99 | VCI-C1,H7   | 0.00  | -0.25 |
| VCI-O5,H13  | -0.04 | -0.37 | VCI-H7,C10  | -0.01 | -0.76 | VxC-C6,H9   | 0.00  | -0.33 |
| VxC-H2,O4   | -0.04 | -0.91 | VxC-O5,H9   | -0.01 | -0.89 | VCI-O5,H11  | 0.00  | -0.29 |
| VCI-O4,H9   | -0.04 | -0.41 | VCI-C6,H11  | -0.01 | -0.76 | VCI-O4,H7   | 0.00  | -0.30 |
| VxC-H3,O5   | -0.04 | -0.90 | VxC-O4,H13  | -0.01 | -0.88 | VCI-H3,H13  | 0.00  | -0.97 |
| VCI-H3,H12  | -0.04 | -0.98 | VCI-H11,H12 | -0.01 | -1.00 | VCI-H2,H9   | 0.00  | -0.97 |
| VCI-H2,H8   | -0.04 | -0.98 | VCI-H7,H8   | -0.01 | -1.00 | VxC-C6,H11  | -0.01 | -0.98 |
| VCI-H7,H9   | -0.06 | -0.98 | VxC-H8,H9   | -0.02 | -1.00 | VxC-H7,C10  | -0.01 | -0.98 |
| VCI-H11,H13 | -0.06 | -0.98 | VxC-H12,H13 | -0.02 | -1.00 | VCI-H11,H12 | -0.01 | -0.83 |
| VxC-H2,H7   | -0.06 | -0.98 | VCI-H12,H13 | -0.02 | -0.99 | VCI-H7,H8   | -0.01 | -0.85 |
| VxC-H3,H11  | -0.06 | -0.98 | VCI-H8,H9   | -0.02 | -0.99 | Eintra-H12  | -0.01 | -0.12 |
| VxC-H7,H9   | -0.09 | -0.96 | VxC-C1,C6   | -0.03 | -0.88 | VxC-H3,O5   | -0.01 | -0.42 |
| VxC-H11,H13 | -0.09 | -0.96 | VxC-C1,C10  | -0.03 | -0.87 | VxC-H2,O4   | -0.01 | -0.43 |
| VCI-H7,C10  | -0.09 | -0.99 | VCI-H2,H3   | -0.03 | -0.93 | VCI-H12,H13 | -0.01 | -0.96 |
| VCI-C6,H11  | -0.09 | -1.00 | VxC-O5,H8   | -0.04 | -0.94 | VCI-H8,H9   | -0.01 | -0.96 |
| Eintra-H9   | -0.09 | -0.49 | VxC-O4,H12  | -0.04 | -0.95 | VxC-H2,H3   | -0.01 | -0.96 |
| Eintra-H13  | -0.09 | -0.51 | VCI-C6,H13  | -0.04 | -0.98 | VCI-O5,C10  | -0.02 | -0.33 |
| VCI-H2,H13  | -0.10 | -0.99 | VxC-H2,H3   | -0.04 | -0.94 | Eintra-H8   | -0.02 | -0.28 |
| VCI-H3,H9   | -0.10 | -0.99 | VCI-H9,C10  | -0.04 | -0.98 | VCI-O4,C6   | -0.02 | -0.36 |
| VCI-O5,H12  | -0.12 | -0.94 | VCI-C6,H9   | -0.04 | -0.95 | VxC-H2,O5   | -0.02 | -0.93 |
| VCI-O4,H8   | -0.13 | -0.93 | VCI-C10,H13 | -0.04 | -0.96 | VxC-O4,H12  | -0.02 | -0.90 |
| Eintra-H7   | -0.14 | -0.98 | VxC-C1,H8   | -0.06 | -0.96 | VxC-H3,O4   | -0.02 | -0.94 |
| Eintra-H11  | -0.15 | -0.98 | VxC-C1,H12  | -0.06 | -0.96 | VxC-O5,H8   | -0.02 | -0.91 |
| VxC-C10,H12 | -0.15 | -0.48 | VCI-C1,H13  | -0.06 | -0.96 | VxC-O4,H11  | -0.03 | -0.99 |
| VxC-C6,H8   | -0.15 | -0.49 | VCI-C1,H9   | -0.06 | -0.96 | VxC-O5,H7   | -0.03 | -0.99 |
| VxC-H2,H8   | -0.23 | -0.49 | VxC-O5,C6   | -0.07 | -0.86 | VCI-C6,H12  | -0.03 | -0.89 |
| VxC-H3,H12  | -0.23 | -0.49 | VxC-O4,C10  | -0.07 | -0.88 | VCI-C6,H13  | -0.03 | -0.69 |
| VCI-C6,H9   | -0.26 | -0.83 | VCI-C1,C10  | -0.08 | -0.54 | VCI-H9,C10  | -0.03 | -0.70 |
| VCI-C10,H13 | -0.27 | -0.83 | VCI-C1,C6   | -0.09 | -0.55 | VCI-H2,O5   | -0.03 | -0.92 |

|             |        |       |             |       |       |             |       |       |
|-------------|--------|-------|-------------|-------|-------|-------------|-------|-------|
| VxC-H3,H13  | -0.28  | -0.95 | VCI-H8,C10  | -0.09 | -1.00 | VCI-H3,O4   | -0.03 | -0.92 |
| VxC-H2,H9   | -0.28  | -0.95 | VCI-C6,H12  | -0.09 | -1.00 | VCI-H3,O5   | -0.04 | -0.95 |
| VCI-C1,H9   | -0.29  | -0.91 | VCI-H2,C10  | -0.09 | -0.88 | VCI-H8,C10  | -0.04 | -0.86 |
| VCI-C1,H13  | -0.30  | -0.91 | VCI-H3,C6   | -0.09 | -0.88 | VCI-H2,O4   | -0.04 | -0.95 |
| VxC-O4,O5   | -0.34  | -0.81 | VCI-H3,C10  | -0.12 | -0.90 | VCI-C1,H13  | -0.04 | -0.43 |
| VCI-C10,H11 | -0.40  | -0.98 | VCI-H2,C6   | -0.12 | -0.90 | VCI-C1,H9   | -0.04 | -0.44 |
| VCI-C6,H7   | -0.41  | -0.98 | VCI-O5,H7   | -0.12 | -0.99 | VCI-O5,H7   | -0.04 | -0.76 |
| VCI-C1,H7   | -0.50  | -0.99 | VCI-O4,H11  | -0.12 | -0.99 | VCI-O4,H11  | -0.04 | -0.75 |
| VCI-C1,H11  | -0.50  | -0.99 | VxC-C10,H13 | -0.13 | -1.00 | VxC-C1,H2   | -0.05 | -1.00 |
| VCI-O4,H12  | -0.69  | -0.97 | VxC-C6,H9   | -0.13 | -1.00 | VxC-C1,H3   | -0.05 | -1.00 |
| VCI-O4,O5   | -0.70  | -0.98 | VxC-H2,C6   | -0.15 | -0.96 | VxC-H9,C10  | -0.05 | -0.96 |
| VCI-O5,H8   | -0.70  | -0.97 | VxC-H3,C10  | -0.15 | -0.96 | VxC-C6,H13  | -0.05 | -0.96 |
| VxC-C10,H13 | -0.88  | -0.99 | Eintra-H12  | -0.16 | -0.92 | VxC-C6,H12  | -0.06 | -0.72 |
| VxC-C6,H9   | -0.88  | -0.99 | Eintra-H8   | -0.16 | -0.92 | VxC-H8,C10  | -0.06 | -0.72 |
| VCI-O4,C6   | -0.91  | -0.90 | VxC-H2,H8   | -0.17 | -0.92 | VCI-C10,H12 | -0.08 | -0.91 |
| VCI-O5,C10  | -0.95  | -0.92 | VxC-H3,H12  | -0.17 | -0.92 | VCI-C6,H8   | -0.09 | -0.92 |
| VxC-H3,C10  | -1.20  | -0.98 | VCI-C10,H12 | -0.22 | -1.00 | VxC-C6,C10  | -0.11 | -0.97 |
| VxC-H2,C6   | -1.20  | -0.98 | VCI-C6,H8   | -0.22 | -1.00 | VCI-C1,H12  | -0.11 | -0.96 |
| VxC-C1,H3   | -1.79  | -0.98 | Eintra-O4   | -0.30 | -0.88 | VxC-H9,H12  | -0.12 | -0.97 |
| VxC-C1,H2   | -1.80  | -0.98 | Eintra-O5   | -0.30 | -0.89 | VxC-H8,H13  | -0.12 | -0.97 |
| VCI-H2,O4   | -1.93  | -0.96 | VCI-C1,H8   | -0.31 | -1.00 | VCI-C1,H8   | -0.13 | -0.94 |
| VCI-H3,O5   | -1.93  | -0.96 | VCI-C1,H12  | -0.31 | -1.00 | VCI-C1,C10  | -0.19 | -0.95 |
| VCI-H3,O4   | -1.97  | -0.96 | VxC-O4,O5   | -0.34 | -0.98 | VCI-C1,C6   | -0.20 | -0.96 |
| VCI-H2,O5   | -1.97  | -0.96 | VCI-C6,C10  | -0.39 | -0.97 | Eintra-O4   | -0.30 | -0.91 |
| VCI-C1,C6   | -3.79  | -0.99 | VCI-C1,H2   | -0.45 | -0.92 | Eintra-O5   | -0.33 | -0.93 |
| VCI-C1,C10  | -3.81  | -0.99 | VCI-C1,H3   | -0.45 | -0.92 | VCI-O4,O5   | -0.36 | -0.99 |
| Eintra-O5   | -4.48  | -0.99 | VCI-O4,O5   | -0.55 | -1.00 | VCI-O5,C6   | -0.56 | -0.89 |
| Eintra-O4   | -4.70  | -0.99 | VCI-O5,C6   | -0.66 | -0.98 | VCI-O4,C10  | -0.57 | -0.89 |
| Eintra-C1   | -13.52 | -0.98 | VCI-O4,C10  | -0.67 | -0.98 | Eintra-C1   | -0.57 | -0.99 |

**Table S2.** REG values of all interactions in the FTHP-R isomer.

| Segment 1    |      |      | Segment 2    |      |      |
|--------------|------|------|--------------|------|------|
| Contribution | REG  | R    | Contribution | REG  | R    |
| VCI-C1,O15   | 1.33 | 0.82 | Eintra-C5    | 0.62 | 0.99 |
| Eintra-C5    | 1.29 | 0.99 | Eintra-O15   | 0.57 | 0.97 |
| Eintra-O15   | 1.18 | 0.97 | VxC-C1,C2    | 0.49 | 0.99 |
| VxC-C1,C2    | 1.14 | 1.00 | VCI-C1,O15   | 0.37 | 0.76 |
| VxC-C2,O15   | 0.48 | 0.99 | VCI-C1,F16   | 0.33 | 0.97 |
| VCI-C5,F16   | 0.46 | 0.61 | VCI-H10,O15  | 0.26 | 0.91 |
| Eintra-C3    | 0.41 | 0.96 | VxC-C2,C3    | 0.20 | 0.94 |
| VCI-C1,H10   | 0.37 | 0.91 | VCI-C5,F16   | 0.20 | 0.65 |
| VCI-O15,F16  | 0.37 | 0.99 | VxC-C2,O15   | 0.17 | 0.95 |
| VxC-C5,F16   | 0.36 | 0.92 | VCI-C2,O15   | 0.17 | 1.00 |
| VCI-C2,O15   | 0.35 | 0.99 | Eintra-H8    | 0.17 | 1.00 |
| Eintra-H14   | 0.35 | 0.93 | Eintra-H14   | 0.17 | 0.99 |
| VCI-C5,H10   | 0.32 | 0.87 | Eintra-H7    | 0.17 | 1.00 |
| Eintra-H7    | 0.32 | 1.00 | VxC-H9,F16   | 0.14 | 0.94 |
| VxC-H10,H11  | 0.29 | 0.96 | VCI-C5,H14   | 0.14 | 0.96 |
| VCI-C4,C5    | 0.28 | 0.99 | VxC-C5,F16   | 0.13 | 0.99 |
| Eintra-H9    | 0.28 | 1.00 | VCI-C1,H9    | 0.13 | 0.85 |
| VxC-C1,C4    | 0.27 | 0.95 | Eintra-H10   | 0.12 | 0.95 |
| VxC-C3,H14   | 0.27 | 0.98 | VxC-C1,F16   | 0.11 | 0.97 |
| VCI-H8,O15   | 0.26 | 0.84 | Eintra-H9    | 0.11 | 0.95 |
| Eintra-H10   | 0.26 | 0.98 | VCI-H10,F16  | 0.11 | 0.95 |
| VCI-C1,F16   | 0.25 | 1.00 | VCI-C2,F16   | 0.11 | 1.00 |
| VCI-C3,C5    | 0.25 | 0.96 | VxC-C1,C3    | 0.10 | 0.98 |
| VCI-C3,C4    | 0.23 | 0.99 | VCI-C3,C5    | 0.10 | 0.99 |
| VCI-C5,H14   | 0.22 | 0.93 | VCI-C4,C5    | 0.09 | 0.88 |
| VxC-C4,H10   | 0.21 | 0.98 | VCI-O15,F16  | 0.09 | 0.72 |
| VxC-C1,C3    | 0.20 | 0.97 | VCI-C5,H7    | 0.06 | 0.78 |
| VCI-C5,H13   | 0.17 | 0.68 | Eintra-H6    | 0.06 | 1.00 |
| VCI-H7,O15   | 0.17 | 0.98 | VxC-H7,H11   | 0.06 | 0.98 |
| VxC-H8,F16   | 0.16 | 0.84 | VCI-C5,H9    | 0.06 | 0.54 |
| VxC-H8,O15   | 0.16 | 0.93 | VxC-H8,O15   | 0.05 | 0.99 |
| VxC-C1,O15   | 0.15 | 0.69 | VxC-C4,H7    | 0.05 | 0.99 |
| VxC-C2,F16   | 0.15 | 0.86 | VxC-C1,O15   | 0.05 | 0.81 |
| VCI-C2,C3    | 0.14 | 0.91 | VCI-C1,H14   | 0.05 | 0.96 |
| VxC-C1,H11   | 0.12 | 0.87 | Eintra-C3    | 0.05 | 0.86 |
| VCI-C5,H6    | 0.11 | 0.96 | VCI-C5,H12   | 0.05 | 0.92 |
| VxC-C4,C5    | 0.10 | 0.99 | VxC-C1,H14   | 0.05 | 0.98 |
| VCI-C2,F16   | 0.09 | 0.99 | VCI-C3,C4    | 0.04 | 0.99 |
| VCI-H9,O15   | 0.09 | 0.55 | VxC-H7,H9    | 0.04 | 0.97 |
| VxC-H7,O15   | 0.09 | 0.96 | VCI-H11,O15  | 0.04 | 0.97 |
| VCI-H7,F16   | 0.08 | 0.98 | VCI-H13,F16  | 0.04 | 0.95 |
| VxC-C3,H10   | 0.07 | 0.88 | VxC-C3,H10   | 0.04 | 0.99 |
| VxC-H6,H11   | 0.07 | 0.95 | VxC-C1,H8    | 0.04 | 0.90 |
| VxC-C2,C5    | 0.07 | 0.85 | VxC-C5,H13   | 0.03 | 0.98 |

|             |      |      |             |      |      |
|-------------|------|------|-------------|------|------|
| VxC-C5,H13  | 0.07 | 0.99 | VxC-C4,F16  | 0.03 | 0.99 |
| VxC-H8,H10  | 0.07 | 0.96 | VxC-H9,H14  | 0.03 | 0.92 |
| VxC-C3,H9   | 0.06 | 0.98 | VxC-C2,C4   | 0.03 | 0.79 |
| VxC-H6,H8   | 0.06 | 0.94 | VCI-C3,H14  | 0.03 | 0.95 |
| VxC-C1,H14  | 0.06 | 0.96 | Eintra-H13  | 0.03 | 0.88 |
| VCI-C1,H14  | 0.06 | 0.77 | Eintra-H12  | 0.02 | 0.86 |
| VCI-H8,F16  | 0.06 | 0.64 | VCI-H11,F16 | 0.02 | 0.95 |
| VCI-C1,H6   | 0.05 | 0.91 | VxC-C5,H10  | 0.02 | 0.98 |
| VCI-C1,C3   | 0.05 | 0.97 | VxC-H7,O15  | 0.02 | 0.52 |
| VxC-H12,H14 | 0.05 | 0.95 | VxC-C3,H9   | 0.02 | 0.69 |
| VCI-C3,H6   | 0.05 | 0.86 | VCI-C2,H7   | 0.02 | 0.68 |
| VxC-C4,H6   | 0.05 | 0.99 | VxC-H12,F16 | 0.02 | 0.97 |
| VxC-C4,F16  | 0.05 | 0.98 | VCI-C1,C3   | 0.02 | 0.97 |
| VxC-C4,H7   | 0.04 | 0.86 | VCI-H13,O15 | 0.02 | 0.42 |
| VCI-H9,F16  | 0.04 | 0.72 | VxC-C2,H9   | 0.02 | 0.93 |
| VxC-C1,C5   | 0.04 | 0.99 | VxC-C2,H11  | 0.02 | 0.64 |
| VCI-H12,F16 | 0.04 | 0.81 | VCI-C5,H6   | 0.02 | 0.96 |
| VCI-C4,H14  | 0.04 | 0.97 | VxC-H6,H8   | 0.02 | 1.00 |
| VxC-C5,H11  | 0.03 | 0.93 | VxC-C1,C5   | 0.01 | 0.94 |
| Eintra-H13  | 0.03 | 0.66 | VxC-H7,H14  | 0.01 | 0.92 |
| VxC-H13,F16 | 0.03 | 0.72 | VxC-C1,H6   | 0.01 | 0.93 |
| VCI-H12,O15 | 0.03 | 0.71 | VCI-C4,H14  | 0.01 | 0.96 |
| VxC-C1,H8   | 0.03 | 0.90 | VCI-C1,H12  | 0.01 | 0.77 |
| VxC-C3,H6   | 0.03 | 0.40 | VxC-C4,H8   | 0.01 | 0.89 |
| VxC-H7,H9   | 0.03 | 0.84 | VCI-C3,H8   | 0.01 | 0.90 |
| VxC-H6,H14  | 0.03 | 1.00 | VCI-C1,H7   | 0.01 | 0.26 |
| VCI-H9,H10  | 0.03 | 0.94 | VCI-C3,H12  | 0.01 | 0.99 |
| VCI-C4,H11  | 0.03 | 0.96 | VxC-C4,H12  | 0.01 | 0.48 |
| VxC-C5,H9   | 0.02 | 0.90 | Eintra-C4   | 0.01 | 0.22 |
| VxC-C4,H12  | 0.02 | 0.36 | VxC-C5,O15  | 0.01 | 0.16 |
| VCI-H7,H10  | 0.02 | 0.98 | VCI-C3,H7   | 0.01 | 0.97 |
| VCI-C5,H11  | 0.02 | 0.33 | VCI-H7,H10  | 0.01 | 0.95 |
| VCI-C3,H7   | 0.02 | 0.95 | VCI-H8,F16  | 0.01 | 0.34 |
| VCI-C4,H6   | 0.02 | 0.99 | VCI-C4,H12  | 0.01 | 0.98 |
| VCI-C4,H10  | 0.02 | 0.83 | VxC-H11,H13 | 0.01 | 0.90 |
| VCI-H10,H13 | 0.02 | 0.88 | VCI-C3,H9   | 0.01 | 0.83 |
| VxC-H11,H12 | 0.02 | 0.98 | VxC-H6,H10  | 0.01 | 1.00 |
| VCI-C3,H13  | 0.01 | 0.91 | VCI-H13,H14 | 0.01 | 0.93 |
| VCI-C3,H10  | 0.01 | 0.75 | VCI-H8,H14  | 0.01 | 1.00 |
| VCI-C4,H13  | 0.01 | 0.85 | VCI-H6,H14  | 0.01 | 0.97 |
| VCI-H6,H14  | 0.01 | 0.90 | VCI-C3,H6   | 0.01 | 0.90 |
| VCI-C1,C4   | 0.01 | 0.49 | VCI-H6,H7   | 0.01 | 1.00 |
| VCI-C2,C4   | 0.01 | 0.98 | VxC-C5,H11  | 0.01 | 0.60 |
| VxC-C4,H9   | 0.01 | 0.95 | VCI-H12,H14 | 0.01 | 0.99 |
| VCI-C3,H12  | 0.01 | 0.93 | VCI-H8,H9   | 0.01 | 0.95 |
| VxC-H9,H14  | 0.01 | 0.98 | VCI-H7,H13  | 0.00 | 0.81 |
| VCI-H13,H14 | 0.01 | 0.96 | VCI-C5,H8   | 0.00 | 0.13 |
| VCI-H10,H14 | 0.01 | 0.96 | VxC-C4,H13  | 0.00 | 0.64 |

|             |      |       |             |      |       |
|-------------|------|-------|-------------|------|-------|
| VxC-H10,H12 | 0.01 | 0.98  | VCI-H7,H9   | 0.00 | 0.59  |
| VCI-H10,H12 | 0.01 | 0.93  | VCI-H7,H8   | 0.00 | 0.81  |
| VxC-C1,H12  | 0.01 | 0.94  | VxC-H6,H11  | 0.00 | 0.56  |
| VCI-H7,H11  | 0.01 | 0.98  | VxC-H10,H13 | 0.00 | 1.00  |
| VCI-C3,H11  | 0.01 | 0.98  | VxC-H11,O15 | 0.00 | 0.14  |
| VCI-H6,H12  | 0.01 | 0.93  | VCI-H9,H13  | 0.00 | 0.57  |
| VxC-C4,H13  | 0.01 | 0.84  | VCI-C3,H13  | 0.00 | 0.78  |
| VCI-C3,H8   | 0.01 | 0.50  | VCI-H7,H14  | 0.00 | 0.75  |
| VxC-H6,H10  | 0.01 | 0.70  | VxC-C1,H13  | 0.00 | 0.47  |
| VxC-C5,H8   | 0.01 | 0.83  | VCI-H7,H12  | 0.00 | 0.79  |
| VxC-H7,H12  | 0.01 | 0.98  | VCI-C4,H9   | 0.00 | 0.54  |
| VCI-H6,H8   | 0.01 | 0.98  | VCI-H9,H12  | 0.00 | 0.72  |
| VCI-C3,H9   | 0.01 | 0.90  | VCI-H12,H13 | 0.00 | 0.94  |
| VxC-H11,F16 | 0.01 | 0.96  | VCI-H10,H11 | 0.00 | 0.67  |
| VxC-H7,F16  | 0.01 | 0.80  | VxC-H7,F16  | 0.00 | 0.97  |
| VxC-H11,H13 | 0.01 | 0.95  | VxC-H8,H12  | 0.00 | 0.90  |
| VxC-H9,H11  | 0.01 | 0.84  | VxC-C5,H7   | 0.00 | 1.00  |
| VxC-C5,H12  | 0.01 | 0.74  | VCI-C4,H6   | 0.00 | 0.88  |
| VCI-H6,H13  | 0.01 | 0.97  | VxC-H7,H12  | 0.00 | 1.00  |
| VCI-H11,H14 | 0.01 | 0.99  | VCI-H11,H14 | 0.00 | 0.66  |
| VCI-H6,H9   | 0.00 | 0.91  | VxC-H12,O15 | 0.00 | 0.78  |
| VxC-H8,H14  | 0.00 | 0.15  | VCI-H6,H12  | 0.00 | 0.97  |
| VCI-C1,H11  | 0.00 | 0.21  | VxC-H10,H14 | 0.00 | 0.89  |
| VCI-H9,H14  | 0.00 | 0.72  | VxC-H8,H13  | 0.00 | 0.96  |
| VxC-C5,H7   | 0.00 | 0.91  | VxC-H11,F16 | 0.00 | 0.96  |
| VCI-C2,H11  | 0.00 | 0.87  | VCI-C4,H7   | 0.00 | 0.25  |
| VCI-C4,H9   | 0.00 | 0.69  | VxC-H6,H14  | 0.00 | 0.19  |
| VxC-C4,H14  | 0.00 | 0.20  | VxC-C5,H8   | 0.00 | 0.99  |
| VCI-H12,H14 | 0.00 | 0.55  | VCI-H8,O15  | 0.00 | 0.02  |
| VxC-H7,H13  | 0.00 | 0.98  | VCI-H8,H12  | 0.00 | 0.81  |
| VCI-H8,H10  | 0.00 | 0.24  | VxC-C3,H11  | 0.00 | 0.12  |
| VxC-C2,H13  | 0.00 | 0.98  | VCI-C4,H8   | 0.00 | 0.25  |
| VxC-C3,H11  | 0.00 | 0.25  | VCI-H6,H13  | 0.00 | 0.82  |
| VCI-C2,H10  | 0.00 | 0.06  | VxC-H10,H12 | 0.00 | 0.84  |
| VCI-H11,H13 | 0.00 | 0.21  | VCI-H6,H9   | 0.00 | 0.65  |
| VxC-H10,H14 | 0.00 | 0.43  | VCI-H10,H14 | 0.00 | 0.09  |
| VxC-H12,H13 | 0.00 | 0.24  | VCI-C2,H8   | 0.00 | 0.04  |
| VCI-H6,H7   | 0.00 | 0.38  | VxC-H7,H13  | 0.00 | 0.55  |
| VxC-H9,H12  | 0.00 | 0.95  | VxC-H9,H11  | 0.00 | 0.14  |
| VxC-H10,H13 | 0.00 | 0.35  | VxC-C2,C5   | 0.00 | 0.20  |
| Eintra-C4   | 0.00 | 0.00  | VxC-C3,H13  | 0.00 | 0.08  |
| VxC-C3,H13  | 0.00 | 0.14  | VxC-H6,H13  | 0.00 | 0.00  |
| VCI-H9,H11  | 0.00 | 0.00  | VxC-H8,H11  | 0.00 | -0.01 |
| VxC-C2,H14  | 0.00 | -0.02 | VxC-C2,H13  | 0.00 | -0.49 |
| VxC-H8,H13  | 0.00 | -0.26 | VxC-C2,H14  | 0.00 | -0.03 |
| VxC-C5,H10  | 0.00 | -0.05 | VCI-C1,H6   | 0.00 | -0.40 |
| VCI-C2,H6   | 0.00 | -0.21 | VCI-H8,H13  | 0.00 | -0.13 |
| VxC-H6,H13  | 0.00 | -0.71 | VxC-H9,H12  | 0.00 | -0.99 |



|             |       |       |             |       |       |
|-------------|-------|-------|-------------|-------|-------|
| VxC-H13,H14 | 0.00  | -0.97 | VCI-H6,H10  | 0.00  | -0.84 |
| VxC-H9,F16  | 0.00  | -0.53 | VCI-C3,H11  | 0.00  | -0.75 |
| VCI-H12,H13 | 0.00  | -0.97 | VxC-C4,H9   | 0.00  | -0.46 |
| VxC-C1,F16  | 0.00  | -0.45 | VxC-H13,H14 | 0.00  | -0.98 |
| VxC-H9,H13  | 0.00  | -0.93 | VxC-H8,F16  | 0.00  | -0.59 |
| VCI-H9,H13  | 0.00  | -0.73 | VxC-H14,O15 | 0.00  | -0.78 |
| VCI-H11,F16 | 0.00  | -0.13 | VxC-H11,H12 | 0.00  | -0.36 |
| VxC-H12,O15 | 0.00  | -0.55 | VxC-C2,H12  | 0.00  | -0.83 |
| VxC-H6,O15  | 0.00  | -0.97 | VxC-H6,O15  | 0.00  | -0.89 |
| VxC-H10,F16 | 0.00  | -0.92 | VxC-C5,H6   | 0.00  | -0.96 |
| VCI-H8,H11  | 0.00  | -0.82 | VCI-H8,H11  | 0.00  | -0.95 |
| VxC-H8,H11  | 0.00  | -0.94 | VCI-H6,H11  | 0.00  | -0.94 |
| VCI-H9,H12  | 0.00  | -0.80 | VCI-H11,H12 | 0.00  | -0.95 |
| VCI-C4,H7   | 0.00  | -0.96 | VxC-H11,H14 | 0.00  | -0.97 |
| VCI-H11,H12 | 0.00  | -0.96 | VCI-H9,H14  | 0.00  | -0.75 |
| VxC-H6,H9   | 0.00  | -0.91 | VxC-C4,O15  | 0.00  | -0.07 |
| VCI-H7,H12  | -0.01 | -0.98 | VCI-C4,H13  | 0.00  | -0.42 |
| VCI-C2,H14  | -0.01 | -0.93 | VCI-H9,H11  | 0.00  | -0.99 |
| VxC-H6,F16  | -0.01 | -0.94 | VxC-H6,H9   | 0.00  | -0.90 |
| VxC-H6,H7   | -0.01 | -0.42 | VxC-H6,H12  | 0.00  | -0.66 |
| VCI-C2,H8   | -0.01 | -0.78 | VxC-H12,H14 | 0.00  | -0.47 |
| VCI-H8,H14  | -0.01 | -0.99 | VxC-C4,H6   | 0.00  | -0.45 |
| VCI-H11,O15 | -0.01 | -0.19 | VCI-C2,H11  | 0.00  | -0.96 |
| VCI-H7,H14  | -0.01 | -0.98 | VCI-C2,H14  | 0.00  | -0.91 |
| VCI-H7,H13  | -0.01 | -0.98 | VCI-H10,H12 | 0.00  | -0.86 |
| VxC-C2,H10  | -0.01 | -0.33 | VCI-H6,H8   | 0.00  | -0.92 |
| VxC-H14,O15 | -0.01 | -0.99 | VxC-C1,H12  | 0.00  | -0.96 |
| VCI-H6,H10  | -0.01 | -0.88 | VxC-H6,F16  | 0.00  | -0.95 |
| VCI-H8,H12  | -0.01 | -0.92 | VxC-H9,H13  | 0.00  | -1.00 |
| VCI-H8,H9   | -0.01 | -0.80 | VxC-H10,F16 | 0.00  | -0.90 |
| VCI-H6,H11  | -0.01 | -0.93 | VCI-C2,H12  | 0.00  | -0.96 |
| VCI-H8,H13  | -0.01 | -0.80 | VCI-C2,H9   | 0.00  | -0.48 |
| VxC-C2,H9   | -0.01 | -0.70 | VxC-C5,H12  | 0.00  | -0.88 |
| VCI-C4,H8   | -0.01 | -0.82 | VCI-H11,H13 | 0.00  | -0.97 |
| VxC-C3,H12  | -0.01 | -0.98 | VxC-H12,H13 | 0.00  | -0.97 |
| VxC-H8,H12  | -0.01 | -0.99 | VxC-C4,H10  | 0.00  | -0.75 |
| VCI-C2,H13  | -0.01 | -0.97 | VCI-C4,H11  | -0.01 | -0.78 |
| VCI-C2,H12  | -0.01 | -1.00 | VxC-C3,H12  | -0.01 | -0.99 |
| VxC-H12,F16 | -0.01 | -0.64 | VxC-C5,H14  | -0.01 | -0.84 |
| VxC-C5,H6   | -0.02 | -0.88 | VCI-H7,H11  | -0.01 | -0.94 |
| VCI-H13,F16 | -0.02 | -0.29 | VCI-C3,H10  | -0.01 | -0.75 |
| VxC-C1,H7   | -0.02 | -0.32 | VxC-C2,F16  | -0.01 | -0.93 |
| VCI-H7,H9   | -0.02 | -0.99 | VCI-C1,H8   | -0.01 | -0.51 |
| VCI-C4,H12  | -0.02 | -0.99 | VxC-H8,H10  | -0.01 | -0.45 |
| VxC-H11,O15 | -0.02 | -0.40 | VCI-H8,H10  | -0.01 | -0.92 |
| VCI-H10,H11 | -0.02 | -0.92 | VCI-C2,H6   | -0.01 | -1.00 |
| VxC-H7,H11  | -0.02 | -0.90 | VxC-H10,H11 | -0.01 | -0.74 |
| VCI-C1,H13  | -0.02 | -0.73 | VxC-C4,H14  | -0.01 | -0.73 |

|             |       |       |             |       |       |
|-------------|-------|-------|-------------|-------|-------|
| VxC-C2,H12  | -0.02 | -0.95 | VCI-H6,F16  | -0.01 | -0.96 |
| VxC-H11,H14 | -0.02 | -0.90 | VCI-C2,H13  | -0.01 | -1.00 |
| VCI-H7,H8   | -0.02 | -0.96 | VCI-H9,H10  | -0.01 | -0.97 |
| VxC-C1,H13  | -0.02 | -0.78 | VCI-H10,H13 | -0.01 | -0.91 |
| VxC-H9,H10  | -0.02 | -0.99 | VxC-C5,H9   | -0.01 | -0.85 |
| Eintra-H6   | -0.03 | -0.96 | VCI-C4,F16  | -0.01 | -0.59 |
| VxC-H6,H12  | -0.03 | -0.97 | VCI-H6,O15  | -0.01 | -0.96 |
| VCI-C2,H9   | -0.03 | -0.98 | VxC-C2,H6   | -0.01 | -0.68 |
| VxC-C2,H6   | -0.03 | -0.81 | VCI-C4,H10  | -0.01 | -0.92 |
| VCI-C5,H12  | -0.04 | -0.65 | VxC-C3,H7   | -0.01 | -0.62 |
| VxC-C4,H11  | -0.04 | -0.95 | VxC-C3,H6   | -0.01 | -0.57 |
| Eintra-H8   | -0.04 | -0.43 | VxC-C2,H10  | -0.02 | -0.98 |
| VCI-H6,F16  | -0.04 | -0.97 | VCI-C2,C3   | -0.02 | -0.65 |
| VCI-C1,H12  | -0.05 | -0.88 | VCI-C2,C4   | -0.02 | -0.99 |
| VxC-C5,H14  | -0.05 | -0.98 | VxC-H7,H8   | -0.02 | -1.00 |
| VCI-C5,H9   | -0.05 | -0.53 | VxC-C4,H11  | -0.02 | -0.97 |
| VCI-C3,H14  | -0.05 | -0.98 | VCI-C1,C4   | -0.02 | -0.97 |
| VxC-H7,H8   | -0.05 | -0.98 | VxC-C3,O15  | -0.02 | -0.99 |
| Eintra-H12  | -0.06 | -0.99 | VxC-H9,H10  | -0.02 | -0.99 |
| VxC-H9,O15  | -0.06 | -1.00 | VCI-H7,F16  | -0.02 | -0.65 |
| VxC-C3,H8   | -0.06 | -0.99 | VxC-C3,H8   | -0.02 | -0.98 |
| VxC-C3,H7   | -0.06 | -0.95 | VCI-H12,F16 | -0.02 | -0.88 |
| VxC-C1,H6   | -0.07 | -1.00 | VxC-C3,C5   | -0.02 | -0.85 |
| VxC-H13,O15 | -0.07 | -0.93 | VCI-C2,H10  | -0.02 | -0.95 |
| VxC-H7,H14  | -0.08 | -1.00 | VCI-C4,O15  | -0.03 | -0.66 |
| VxC-C2,H7   | -0.08 | -0.69 | VxC-H13,O15 | -0.03 | -0.90 |
| VxC-C4,O15  | -0.08 | -0.72 | VxC-C1,H11  | -0.03 | -0.89 |
| VxC-C4,H8   | -0.08 | -1.00 | VCI-C1,H13  | -0.03 | -1.00 |
| VxC-C1,H9   | -0.08 | -0.75 | VCI-C1,H11  | -0.03 | -0.99 |
| VxC-C3,O15  | -0.09 | -0.96 | VxC-C1,H10  | -0.03 | -0.86 |
| VxC-C2,H11  | -0.09 | -0.99 | Eintra-H11  | -0.03 | -0.99 |
| VxC-H10,O15 | -0.10 | -0.97 | VxC-C1,H7   | -0.03 | -0.92 |
| VCI-C1,H7   | -0.10 | -0.98 | VxC-H13,F16 | -0.04 | -0.99 |
| VCI-C2,H7   | -0.11 | -0.99 | VCI-H12,O15 | -0.04 | -0.92 |
| VxC-C3,C5   | -0.11 | -0.98 | VCI-C5,H11  | -0.04 | -0.92 |
| VCI-H14,F16 | -0.11 | -0.93 | VxC-H8,H14  | -0.04 | -0.96 |
| VCI-H6,O15  | -0.12 | -0.94 | VxC-H9,O15  | -0.04 | -0.95 |
| VxC-H8,H9   | -0.12 | -1.00 | VxC-C3,H14  | -0.04 | -0.98 |
| VCI-C4,F16  | -0.13 | -0.99 | VxC-H6,H7   | -0.05 | -1.00 |
| VxC-C2,C4   | -0.14 | -0.99 | VCI-C3,F16  | -0.05 | -0.99 |
| VCI-C5,H7   | -0.15 | -0.98 | VCI-C5,H13  | -0.05 | -0.74 |
| VxC-C3,F16  | -0.15 | -0.98 | VxC-H10,O15 | -0.05 | -1.00 |
| VCI-C3,F16  | -0.15 | -0.98 | VxC-H8,H9   | -0.05 | -0.97 |
| VCI-H13,O15 | -0.15 | -0.73 | VxC-C4,C5   | -0.06 | -0.96 |
| VCI-H10,F16 | -0.15 | -0.87 | VCI-H9,O15  | -0.06 | -0.47 |
| VCI-C1,H9   | -0.15 | -0.74 | VCI-H9,F16  | -0.06 | -0.81 |
| VxC-O15,F16 | -0.17 | -0.82 | VxC-H7,H10  | -0.07 | -1.00 |
| VxC-H7,H10  | -0.18 | -1.00 | VxC-C3,F16  | -0.07 | -0.90 |

|             |       |       |             |       |       |
|-------------|-------|-------|-------------|-------|-------|
| VCI-H14,O15 | -0.18 | -0.91 | VxC-C1,C4   | -0.07 | -0.94 |
| VxC-C5,O15  | -0.19 | -0.63 | VCI-C3,O15  | -0.07 | -0.98 |
| VCI-C5,H8   | -0.20 | -0.81 | VxC-C3,C4   | -0.08 | -0.99 |
| VCI-C4,O15  | -0.21 | -0.99 | VCI-H14,F16 | -0.09 | -0.96 |
| VCI-C3,O15  | -0.21 | -0.95 | VCI-H7,O15  | -0.10 | -0.85 |
| VCI-C2,C5   | -0.23 | -0.99 | VxC-H14,F16 | -0.10 | -0.87 |
| VCI-C1,H8   | -0.24 | -0.94 | VCI-H14,O15 | -0.11 | -0.96 |
| Eintra-F16  | -0.26 | -0.58 | Eintra-C1   | -0.12 | -0.54 |
| Eintra-H11  | -0.30 | -0.99 | VxC-C2,H7   | -0.13 | -0.97 |
| VxC-C2,H8   | -0.32 | -0.91 | VxC-C2,H8   | -0.14 | -0.95 |
| Eintra-C2   | -0.34 | -0.94 | VxC-C1,H9   | -0.15 | -0.95 |
| VxC-C2,C3   | -0.37 | -0.80 | VxC-O15,F16 | -0.17 | -0.92 |
| VxC-C1,H10  | -0.39 | -0.99 | VCI-C2,C5   | -0.17 | -1.00 |
| VCI-H10,O15 | -0.39 | -0.88 | VCI-C5,H10  | -0.19 | -0.92 |
| VCI-C1,C5   | -0.44 | -0.92 | Eintra-F16  | -0.20 | -0.80 |
| VxC-H14,F16 | -0.48 | -0.98 | VCI-C1,C2   | -0.23 | -0.99 |
| VCI-C1,C2   | -0.60 | -1.00 | VCI-C1,H10  | -0.25 | -0.94 |
| VxC-C3,C4   | -0.71 | -0.97 | Eintra-C2   | -0.27 | -1.00 |
| Eintra-C1   | -1.00 | -0.85 | VCI-C1,C5   | -0.31 | -0.88 |
| VCI-C5,O15  | -3.69 | -0.96 | VCI-C5,O15  | -1.47 | -0.99 |

**Table S3.** REG values of all interactions in the FTHP-S isomer.

| Segment 1    |      |      | Segment 2    |      |      |
|--------------|------|------|--------------|------|------|
| Contribution | REG  | R    | Contribution | REG  | R    |
| Eintra-C1    | 1.56 | 0.95 | VCl-C5,F16   | 3.73 | 0.99 |
| Eintra-C5    | 1.45 | 0.99 | Eintra-O15   | 1.06 | 0.93 |
| VxC-C5,O15   | 0.96 | 0.95 | VxC-C1,O15   | 0.78 | 0.98 |
| VCl-C1,F16   | 0.94 | 0.94 | VCl-C1,O15   | 0.70 | 0.75 |
| VCl-C1,C2    | 0.82 | 1.00 | VCl-C5,H13   | 0.66 | 0.97 |
| VxC-C3,O15   | 0.76 | 1.00 | VxC-C5,F16   | 0.62 | 0.99 |
| VCl-H9,O15   | 0.73 | 0.97 | VxC-C4,C5    | 0.37 | 0.99 |
| VxC-C1,O15   | 0.66 | 0.97 | Eintra-H13   | 0.35 | 0.97 |
| Eintra-C2    | 0.56 | 0.99 | VCl-C5,H9    | 0.30 | 0.91 |
| VCl-C4,C5    | 0.54 | 0.99 | VCl-C1,H9    | 0.29 | 0.89 |
| VCl-H13,O15  | 0.48 | 0.94 | VxC-C2,O15   | 0.29 | 0.99 |
| VxC-H14,O15  | 0.40 | 1.00 | Eintra-H11   | 0.28 | 1.00 |
| VxC-C1,H9    | 0.39 | 0.96 | Eintra-H9    | 0.22 | 0.93 |
| VxC-H10,F16  | 0.36 | 0.86 | VCl-O15,F16  | 0.20 | 0.98 |
| VxC-C2,H8    | 0.36 | 1.00 | VxC-C4,O15   | 0.20 | 0.97 |
| VCl-H9,F16   | 0.35 | 0.99 | VCl-H10,O15  | 0.14 | 0.84 |
| Eintra-C4    | 0.33 | 0.98 | VxC-H7,O15   | 0.13 | 0.98 |
| VCl-C3,O15   | 0.33 | 0.99 | VCl-C1,H13   | 0.12 | 0.98 |
| VCl-H13,F16  | 0.30 | 0.98 | Eintra-C3    | 0.12 | 0.99 |
| VCl-C2,C5    | 0.29 | 1.00 | VCl-C5,H11   | 0.12 | 1.00 |
| VxC-C1,F16   | 0.28 | 0.85 | VxC-C1,C5    | 0.11 | 0.96 |
| VCl-H14,O15  | 0.27 | 0.99 | VCl-C1,C2    | 0.11 | 0.94 |
| VxC-C4,O15   | 0.23 | 1.00 | Eintra-H8    | 0.11 | 0.96 |
| Eintra-F16   | 0.22 | 0.26 | VCl-H7,F16   | 0.11 | 0.99 |
| VxC-C2,H7    | 0.22 | 1.00 | VCl-C3,C5    | 0.10 | 0.98 |
| VCl-C1,H10   | 0.19 | 0.74 | VCl-H7,O15   | 0.10 | 0.99 |
| VCl-C3,F16   | 0.18 | 0.99 | VxC-H9,H13   | 0.10 | 0.94 |
| VCl-H14,F16  | 0.16 | 1.00 | VxC-C4,H11   | 0.10 | 0.98 |
| VxC-C5,H13   | 0.15 | 0.91 | VxC-H11,O15  | 0.09 | 0.98 |
| VCl-C5,H12   | 0.15 | 1.00 | VCl-C3,C4    | 0.09 | 0.99 |
| VxC-C4,H11   | 0.14 | 0.98 | Eintra-H12   | 0.08 | 1.00 |
| VCl-C1,H8    | 0.13 | 0.98 | VCl-C5,H14   | 0.07 | 0.91 |
| Eintra-H11   | 0.12 | 0.94 | VCl-C5,H8    | 0.07 | 0.98 |
| VCl-C5,H8    | 0.12 | 0.95 | VxC-C1,F16   | 0.07 | 0.95 |
| VxC-C1,C5    | 0.12 | 0.96 | VxC-C5,H9    | 0.07 | 0.90 |
| VCl-O15,F16  | 0.11 | 0.45 | VCl-C2,C3    | 0.06 | 0.99 |
| VCl-C5,H11   | 0.09 | 0.98 | Eintra-H10   | 0.06 | 0.94 |
| VxC-H7,H10   | 0.09 | 0.99 | VxC-C3,C5    | 0.06 | 0.98 |
| VCl-C3,C4    | 0.07 | 0.99 | VxC-C3,H9    | 0.06 | 0.90 |
| VxC-C2,O15   | 0.07 | 0.64 | VxC-H12,F16  | 0.06 | 1.00 |
| VxC-C3,H14   | 0.07 | 0.97 | VxC-H9,H14   | 0.05 | 0.75 |
| VxC-C5,H9    | 0.07 | 0.99 | VCl-H10,F16  | 0.05 | 0.89 |
| VxC-C1,H10   | 0.06 | 0.63 | VCl-C1,C3    | 0.05 | 0.98 |
| VCl-C2,H10   | 0.06 | 1.00 | VCl-C1,H11   | 0.05 | 1.00 |

|             |      |      |             |      |      |
|-------------|------|------|-------------|------|------|
| VxC-C1,H13  | 0.06 | 0.92 | VxC-H13,H14 | 0.04 | 0.99 |
| VCI-C1,C4   | 0.06 | 0.99 | Eintra-C2   | 0.04 | 0.72 |
| VxC-C4,H12  | 0.06 | 0.93 | VCI-C1,H8   | 0.04 | 1.00 |
| VxC-H8,H9   | 0.05 | 0.97 | VCI-C3,H14  | 0.04 | 0.92 |
| VCI-C2,C3   | 0.05 | 0.83 | VxC-H12,O15 | 0.04 | 0.99 |
| VxC-C3,H8   | 0.05 | 0.92 | VxC-C4,H13  | 0.04 | 0.93 |
| VCI-C1,H7   | 0.05 | 0.92 | VxC-C3,H13  | 0.03 | 0.98 |
| Eintra-H13  | 0.05 | 0.31 | VCI-C1,F16  | 0.03 | 0.74 |
| VCI-C1,H12  | 0.05 | 0.99 | VxC-C2,H8   | 0.03 | 0.91 |
| Eintra-H6   | 0.05 | 0.99 | VxC-C5,H11  | 0.03 | 0.98 |
| VCI-C2,C4   | 0.05 | 0.99 | VCI-C2,H9   | 0.03 | 0.94 |
| VxC-C2,H6   | 0.04 | 0.99 | VCI-C4,H13  | 0.03 | 0.96 |
| VCI-C5,H6   | 0.04 | 0.95 | VxC-C3,F16  | 0.03 | 0.97 |
| VCI-H7,O15  | 0.04 | 0.84 | VxC-H11,H13 | 0.03 | 0.98 |
| VxC-C3,H7   | 0.04 | 0.99 | VCI-H12,O15 | 0.03 | 0.97 |
| VxC-H7,H8   | 0.04 | 0.99 | VxC-C5,H10  | 0.03 | 0.89 |
| VxC-H6,H7   | 0.04 | 0.95 | Eintra-H7   | 0.02 | 0.69 |
| VxC-C1,C4   | 0.04 | 0.86 | VxC-C1,C3   | 0.02 | 0.44 |
| VxC-H8,H14  | 0.03 | 0.89 | VxC-C3,H8   | 0.02 | 1.00 |
| VxC-H6,O15  | 0.03 | 1.00 | VCI-C1,H14  | 0.02 | 0.75 |
| VCI-C1,H6   | 0.03 | 0.99 | VCI-C3,H11  | 0.02 | 1.00 |
| VCI-C2,H8   | 0.02 | 0.73 | VCI-C2,H8   | 0.02 | 0.96 |
| VxC-H11,O15 | 0.02 | 0.98 | VCI-H11,H13 | 0.02 | 0.98 |
| VxC-C3,H12  | 0.02 | 0.98 | VCI-C3,H13  | 0.02 | 0.97 |
| VxC-C2,F16  | 0.02 | 1.00 | VxC-H8,H14  | 0.02 | 0.99 |
| Eintra-H12  | 0.02 | 0.92 | VCI-H14,O15 | 0.02 | 0.63 |
| VCI-C2,H6   | 0.02 | 1.00 | VxC-C5,H14  | 0.02 | 0.99 |
| VCI-C4,H12  | 0.02 | 0.96 | VxC-C2,H14  | 0.02 | 0.97 |
| VCI-H8,H10  | 0.02 | 1.00 | VxC-C1,H13  | 0.02 | 0.37 |
| VCI-C4,H6   | 0.02 | 0.98 | VCI-C3,H8   | 0.02 | 0.97 |
| VxC-C3,H6   | 0.02 | 0.86 | VCI-H9,H10  | 0.01 | 0.87 |
| VCI-H9,H14  | 0.01 | 0.92 | VCI-C2,H13  | 0.01 | 0.99 |
| VCI-C1,H11  | 0.01 | 0.99 | VCI-C4,H9   | 0.01 | 0.91 |
| VCI-C2,H12  | 0.01 | 1.00 | VCI-C2,C4   | 0.01 | 1.00 |
| VCI-H11,H12 | 0.01 | 1.00 | VxC-H8,O15  | 0.01 | 0.90 |
| VCI-C2,H11  | 0.01 | 1.00 | VxC-C4,H14  | 0.01 | 0.98 |
| VxC-H11,H12 | 0.01 | 0.99 | VxC-H8,H10  | 0.01 | 0.90 |
| VCI-C2,H9   | 0.01 | 0.58 | VCI-C3,H9   | 0.01 | 0.85 |
| VxC-H12,H14 | 0.01 | 0.93 | VCI-C2,C5   | 0.01 | 0.63 |
| VCI-C4,H8   | 0.01 | 0.97 | VCI-C4,H12  | 0.01 | 0.79 |
| VxC-H9,H13  | 0.01 | 0.98 | VxC-H12,H14 | 0.01 | 0.99 |
| VCI-H7,H8   | 0.01 | 0.99 | VCI-H8,H9   | 0.01 | 0.95 |
| VxC-C3,H13  | 0.01 | 0.96 | VCI-H9,H11  | 0.01 | 0.93 |
| VxC-H8,H10  | 0.01 | 0.46 | VxC-H6,H14  | 0.01 | 0.99 |
| VCI-C4,H10  | 0.01 | 0.77 | VCI-C4,H14  | 0.01 | 0.96 |
| VCI-C4,H7   | 0.01 | 0.99 | VCI-H12,H13 | 0.01 | 1.00 |
| VCI-H12,H13 | 0.01 | 0.94 | VxC-C4,F16  | 0.01 | 0.22 |
| VCI-H8,H11  | 0.00 | 0.95 | VxC-C1,H10  | 0.01 | 0.12 |

|             |      |       |             |      |      |
|-------------|------|-------|-------------|------|------|
| VCI-H6,H11  | 0.00 | 0.98  | VxC-H6,H7   | 0.01 | 0.87 |
| VCI-H6,H8   | 0.00 | 0.92  | VxC-H10,F16 | 0.01 | 0.98 |
| VCI-H8,H13  | 0.00 | 0.83  | VCI-C5,H6   | 0.01 | 0.57 |
| VxC-H7,O15  | 0.00 | 0.12  | VxC-C4,H9   | 0.01 | 1.00 |
| VCI-H7,H11  | 0.00 | 0.97  | VCI-C4,H11  | 0.01 | 0.44 |
| VCI-C2,H13  | 0.00 | 0.62  | VCI-H10,H13 | 0.01 | 0.99 |
| VxC-C4,H10  | 0.00 | 0.84  | VCI-C2,H10  | 0.01 | 0.82 |
| VCI-H8,H12  | 0.00 | 0.99  | VCI-H11,H12 | 0.01 | 1.00 |
| VCI-H6,H12  | 0.00 | 0.99  | VCI-C4,F16  | 0.01 | 0.53 |
| VxC-C1,H12  | 0.00 | 0.94  | VCI-H6,H9   | 0.00 | 0.93 |
| VCI-H10,H12 | 0.00 | 0.75  | VxC-C2,H13  | 0.00 | 1.00 |
| VxC-C1,H11  | 0.00 | 0.74  | VCI-H11,H14 | 0.00 | 0.93 |
| VCI-H6,H10  | 0.00 | 0.92  | VCI-C4,H8   | 0.00 | 0.97 |
| VxC-C4,H14  | 0.00 | 0.18  | VCI-C3,H12  | 0.00 | 0.99 |
| VxC-H10,H11 | 0.00 | 0.88  | VCI-H6,H13  | 0.00 | 0.98 |
| VxC-H6,H13  | 0.00 | 0.97  | VCI-C1,H6   | 0.00 | 0.98 |
| VCI-C2,H7   | 0.00 | 0.06  | VCI-H8,H13  | 0.00 | 0.96 |
| VxC-H6,H9   | 0.00 | 0.54  | VCI-H8,H11  | 0.00 | 0.99 |
| VxC-C2,H13  | 0.00 | 0.98  | VCI-H9,H12  | 0.00 | 0.92 |
| VCI-H7,H13  | 0.00 | 0.45  | VCI-C4,H6   | 0.00 | 0.97 |
| VxC-H12,H13 | 0.00 | 0.12  | VxC-C3,H10  | 0.00 | 0.62 |
| VxC-C4,H8   | 0.00 | 0.49  | VCI-C2,H11  | 0.00 | 0.98 |
| VxC-H7,F16  | 0.00 | 0.06  | VCI-H10,H14 | 0.00 | 0.86 |
| VCI-H7,H12  | 0.00 | 0.35  | VxC-H6,H9   | 0.00 | 0.94 |
| VCI-H6,H13  | 0.00 | 0.17  | VCI-H6,H14  | 0.00 | 0.86 |
| VxC-H14,F16 | 0.00 | 0.17  | VxC-H6,F16  | 0.00 | 1.00 |
| VxC-H9,H12  | 0.00 | 0.94  | VCI-H6,H8   | 0.00 | 1.00 |
| VxC-C4,H9   | 0.00 | 0.03  | VxC-H7,H13  | 0.00 | 1.00 |
| VxC-H8,H12  | 0.00 | -0.07 | VxC-H6,H10  | 0.00 | 0.93 |
| VCI-C4,H13  | 0.00 | -0.02 | VxC-H7,H9   | 0.00 | 0.50 |
| VxC-C2,H12  | 0.00 | -0.41 | VxC-C1,C4   | 0.00 | 0.77 |
| VxC-H8,H11  | 0.00 | -0.51 | VxC-H9,H11  | 0.00 | 0.99 |
| VxC-H8,H13  | 0.00 | -0.93 | VxC-H8,F16  | 0.00 | 1.00 |
| VxC-H7,H13  | 0.00 | -0.91 | VCI-C2,H14  | 0.00 | 0.63 |
| VxC-C4,H6   | 0.00 | -0.51 | VCI-H6,H11  | 0.00 | 1.00 |
| VCI-H8,H9   | 0.00 | -0.17 | VCI-H10,H11 | 0.00 | 0.87 |
| VxC-H8,F16  | 0.00 | -0.96 | VCI-H7,H9   | 0.00 | 0.69 |
| VCI-H10,H11 | 0.00 | -0.38 | VCI-H8,H12  | 0.00 | 0.99 |
| VxC-C1,H7   | 0.00 | -0.25 | VxC-C3,H12  | 0.00 | 0.29 |
| VCI-C3,H8   | 0.00 | -0.23 | VCI-C3,H6   | 0.00 | 0.25 |
| VxC-H10,H12 | 0.00 | -0.99 | VCI-H8,H10  | 0.00 | 0.62 |
| VxC-C5,H8   | 0.00 | -0.82 | VCI-C3,H10  | 0.00 | 0.37 |
| VxC-C2,H14  | 0.00 | -0.50 | VxC-H6,H13  | 0.00 | 0.97 |
| VxC-H6,H12  | 0.00 | -0.92 | VCI-H7,H14  | 0.00 | 0.96 |
| VxC-H9,H11  | 0.00 | -1.00 | VxC-H9,H12  | 0.00 | 0.99 |
| VxC-H7,H14  | 0.00 | -0.60 | VxC-C4,H10  | 0.00 | 0.98 |
| VxC-H11,H14 | 0.00 | -0.97 | VCI-H6,H12  | 0.00 | 0.97 |
| VxC-H6,F16  | 0.00 | -0.99 | VxC-H14,F16 | 0.00 | 0.61 |

|             |       |       |             |       |       |
|-------------|-------|-------|-------------|-------|-------|
| VCI-H7,H14  | 0.00  | -0.99 | VxC-H10,O15 | 0.00  | 0.01  |
| VCI-H9,H12  | 0.00  | -0.91 | VxC-H6,H11  | 0.00  | 0.20  |
| VCI-H7,F16  | 0.00  | -0.11 | VxC-H10,H11 | 0.00  | 0.99  |
| VCI-C3,H12  | 0.00  | -0.86 | VxC-H10,H12 | 0.00  | 0.64  |
| VCI-H6,H7   | 0.00  | -0.91 | VxC-C1,H6   | 0.00  | 0.10  |
| VCI-H6,H9   | 0.00  | -0.87 | VCI-H12,H14 | 0.00  | 0.08  |
| VxC-H7,H12  | 0.00  | -0.89 | VxC-C1,H12  | 0.00  | -0.37 |
| VCI-C3,H7   | -0.01 | -0.95 | VxC-H8,H13  | 0.00  | -1.00 |
| VxC-H6,H11  | -0.01 | -0.97 | VxC-H10,H14 | 0.00  | -0.31 |
| VCI-H7,H9   | -0.01 | -0.98 | VxC-C5,H8   | 0.00  | -0.97 |
| VCI-H7,H10  | -0.01 | -0.99 | VCI-H6,F16  | 0.00  | -0.18 |
| VxC-H11,F16 | -0.01 | -0.24 | VCI-C2,H12  | 0.00  | -0.71 |
| VxC-C5,H6   | -0.01 | -0.99 | VCI-H7,H11  | 0.00  | -0.52 |
| VxC-H10,H14 | -0.01 | -0.99 | VCI-H6,H10  | 0.00  | -0.88 |
| VCI-C3,H6   | -0.01 | -0.91 | VxC-C5,H6   | 0.00  | -0.82 |
| VxC-C1,H6   | -0.01 | -0.95 | VxC-C3,H6   | 0.00  | -0.31 |
| VCI-H12,H14 | -0.01 | -0.99 | VxC-C2,F16  | 0.00  | -0.77 |
| VCI-H8,H14  | -0.01 | -0.97 | VxC-C1,H11  | 0.00  | -0.97 |
| VxC-H12,F16 | -0.01 | -0.70 | VxC-H11,H14 | 0.00  | -0.88 |
| VCI-H11,O15 | -0.01 | -0.30 | VCI-C2,H6   | 0.00  | -0.86 |
| VCI-H10,H13 | -0.01 | -0.78 | VCI-H10,H12 | 0.00  | -0.94 |
| VCI-H10,O15 | -0.01 | -0.03 | VxC-H8,H11  | 0.00  | -0.99 |
| VxC-H6,H14  | -0.01 | -0.95 | VCI-C3,H7   | 0.00  | -0.98 |
| VxC-H6,H10  | -0.01 | -0.98 | VxC-C4,H8   | 0.00  | -0.99 |
| VxC-H13,H14 | -0.01 | -0.95 | VCI-H7,H8   | 0.00  | -0.93 |
| VCI-C3,H11  | -0.01 | -0.97 | VCI-H8,H14  | 0.00  | -0.98 |
| VCI-C3,H10  | -0.01 | -0.78 | VxC-H7,H14  | 0.00  | -0.99 |
| VCI-H13,H14 | -0.01 | -0.99 | VxC-H8,H12  | 0.00  | -1.00 |
| VCI-H6,H14  | -0.01 | -0.99 | VCI-H9,H13  | 0.00  | -0.33 |
| VxC-C5,H7   | -0.01 | -0.95 | VxC-H7,H8   | 0.00  | -0.53 |
| VxC-H9,F16  | -0.01 | -0.89 | VxC-H6,H12  | 0.00  | -1.00 |
| VCI-C4,H14  | -0.01 | -0.98 | Eintra-H6   | 0.00  | -0.66 |
| VCI-H11,H14 | -0.01 | -0.99 | VCI-H6,H7   | 0.00  | -1.00 |
| VCI-H10,H14 | -0.01 | -0.99 | VCI-H7,H12  | 0.00  | -0.98 |
| VxC-H10,H13 | -0.01 | -0.99 | VxC-C1,H7   | 0.00  | -0.45 |
| VCI-H11,H13 | -0.01 | -0.92 | VxC-H7,H12  | 0.00  | -1.00 |
| VCI-H9,H11  | -0.01 | -0.96 | VCI-H7,H13  | 0.00  | -0.95 |
| VxC-C3,H11  | -0.01 | -0.92 | VCI-C4,H10  | 0.00  | -0.94 |
| VxC-C2,C5   | -0.01 | -0.65 | VxC-C4,H6   | 0.00  | -0.83 |
| VCI-C2,H14  | -0.02 | -1.00 | VCI-C4,H7   | 0.00  | -0.97 |
| VxC-H6,H8   | -0.02 | -0.90 | VCI-H7,H10  | -0.01 | -0.99 |
| VxC-C2,H10  | -0.02 | -0.85 | VxC-C2,H12  | -0.01 | -1.00 |
| VxC-C5,H14  | -0.02 | -0.98 | VCI-H12,F16 | -0.01 | -0.95 |
| VCI-C4,H9   | -0.02 | -0.93 | VxC-C2,H6   | -0.01 | -0.55 |
| VCI-C5,H7   | -0.02 | -0.42 | VxC-C5,H7   | -0.01 | -0.99 |
| VxC-H9,H10  | -0.02 | -0.92 | VxC-H6,O15  | -0.01 | -0.92 |
| VxC-C5,H10  | -0.02 | -0.70 | VxC-C3,H11  | -0.01 | -0.76 |
| VCI-H6,F16  | -0.02 | -0.98 | VxC-H10,H13 | -0.01 | -0.95 |

|             |       |       |             |       |       |
|-------------|-------|-------|-------------|-------|-------|
| VCI-H6,O15  | -0.02 | -0.83 | VxC-C3,H7   | -0.01 | -0.63 |
| VxC-C5,H12  | -0.03 | -0.98 | VCI-C1,C4   | -0.01 | -0.59 |
| VCI-C4,H11  | -0.03 | -0.98 | VxC-H7,F16  | -0.01 | -0.95 |
| VCI-H9,H13  | -0.03 | -0.98 | VxC-H9,F16  | -0.01 | -0.98 |
| VxC-H11,H13 | -0.03 | -0.99 | VxC-H11,H12 | -0.01 | -1.00 |
| VCI-H10,F16 | -0.04 | -0.37 | VxC-H6,H8   | -0.01 | -0.99 |
| VxC-C2,H11  | -0.04 | -0.87 | VxC-H9,H10  | -0.01 | -0.98 |
| VxC-C3,C5   | -0.04 | -0.97 | VCI-H13,H14 | -0.01 | -0.99 |
| VCI-C3,H13  | -0.04 | -0.99 | Eintra-C4   | -0.01 | -0.43 |
| VxC-H9,O15  | -0.04 | -0.64 | VxC-C2,H9   | -0.01 | -0.78 |
| VCI-H8,F16  | -0.04 | -0.91 | VCI-H9,H14  | -0.01 | -0.91 |
| VxC-H12,O15 | -0.04 | -0.99 | VCI-C1,H12  | -0.02 | -0.97 |
| VCI-C3,H9   | -0.04 | -0.98 | VCI-C2,F16  | -0.02 | -0.95 |
| VCI-H12,F16 | -0.04 | -0.99 | VxC-C1,H14  | -0.02 | -0.61 |
| VxC-C4,H13  | -0.04 | -0.96 | VxC-C2,H10  | -0.02 | -0.96 |
| VxC-H10,O15 | -0.04 | -0.81 | VxC-C5,H12  | -0.02 | -0.95 |
| VCI-H9,H10  | -0.05 | -0.98 | Eintra-H14  | -0.02 | -0.98 |
| VxC-C3,F16  | -0.05 | -0.99 | VxC-C2,C5   | -0.03 | -0.98 |
| VxC-C5,H11  | -0.05 | -0.98 | VCI-H6,O15  | -0.03 | -0.92 |
| Eintra-H7   | -0.05 | -0.68 | VxC-H7,H10  | -0.03 | -0.90 |
| VCI-H11,F16 | -0.05 | -0.99 | VxC-H14,O15 | -0.03 | -0.79 |
| VxC-H13,O15 | -0.06 | -0.52 | VxC-H9,O15  | -0.04 | -0.96 |
| VxC-C3,H9   | -0.07 | -0.91 | VxC-C3,H14  | -0.04 | -0.83 |
| Eintra-H8   | -0.07 | -0.95 | VCI-C2,H7   | -0.04 | -0.94 |
| VCI-C5,H10  | -0.07 | -0.34 | VCI-C5,H12  | -0.04 | -0.99 |
| VxC-C3,H10  | -0.08 | -0.98 | VCI-C4,C5   | -0.04 | -0.63 |
| VxC-H7,H9   | -0.08 | -0.98 | VCI-H8,F16  | -0.04 | -0.98 |
| VxC-C2,C4   | -0.09 | -0.83 | VxC-C2,H7   | -0.05 | -0.83 |
| VxC-H7,H11  | -0.10 | -0.90 | VxC-O15,F16 | -0.05 | -0.30 |
| VxC-H8,O15  | -0.10 | -0.98 | VxC-C1,H8   | -0.05 | -1.00 |
| VCI-C2,F16  | -0.10 | -0.99 | VxC-C2,H11  | -0.05 | -1.00 |
| Eintra-H9   | -0.11 | -0.70 | VxC-H8,H9   | -0.05 | -0.96 |
| VCI-C3,H14  | -0.11 | -0.99 | VxC-H13,F16 | -0.05 | -1.00 |
| VxC-C2,H9   | -0.11 | -0.99 | VxC-H12,H13 | -0.05 | -1.00 |
| VxC-C4,H7   | -0.11 | -0.90 | VCI-H11,F16 | -0.06 | -1.00 |
| VxC-H9,H14  | -0.11 | -0.97 | VCI-H14,F16 | -0.06 | -0.96 |
| VCI-H12,O15 | -0.12 | -1.00 | VCI-H8,O15  | -0.07 | -0.98 |
| VCI-C1,C3   | -0.12 | -0.99 | VxC-C2,C3   | -0.07 | -0.97 |
| VxC-C4,F16  | -0.13 | -0.99 | VCI-C3,F16  | -0.07 | -0.99 |
| VxC-C5,F16  | -0.13 | -0.74 | VxC-H7,H11  | -0.08 | -1.00 |
| Eintra-H10  | -0.14 | -0.68 | VxC-C4,H7   | -0.08 | -1.00 |
| VxC-C1,H14  | -0.15 | -0.99 | VCI-C1,H7   | -0.09 | -0.97 |
| VxC-C1,H8   | -0.16 | -0.99 | VCI-C2,O15  | -0.10 | -0.98 |
| VCI-C1,H14  | -0.16 | -1.00 | VxC-H13,O15 | -0.10 | -0.93 |
| VxC-H13,F16 | -0.17 | -0.99 | VxC-C4,H12  | -0.10 | -0.98 |
| VCI-C1,H13  | -0.17 | -0.99 | VCI-C3,O15  | -0.11 | -0.99 |
| VCI-C4,O15  | -0.18 | -0.94 | VCI-C5,H10  | -0.11 | -0.93 |
| VCI-H8,O15  | -0.18 | -0.96 | VCI-C4,O15  | -0.12 | -0.87 |



|             |       |       |             |       |       |
|-------------|-------|-------|-------------|-------|-------|
| VCI-C4,F16  | -0.22 | -0.99 | VxC-C3,O15  | -0.14 | -0.89 |
| VCI-C5,O15  | -0.22 | -0.22 | VxC-C2,C4   | -0.14 | -1.00 |
| VxC-C3,C4   | -0.23 | -1.00 | VCI-C5,H7   | -0.15 | -0.99 |
| VxC-C1,C3   | -0.25 | -0.99 | VCI-H9,F16  | -0.16 | -0.94 |
| VxC-C2,C3   | -0.29 | -0.94 | VCI-H11,O15 | -0.16 | -0.99 |
| Eintra-H14  | -0.30 | -0.98 | VCI-H13,F16 | -0.18 | -0.97 |
| VCI-C5,H14  | -0.31 | -1.00 | VxC-C1,C2   | -0.19 | -0.93 |
| VCI-C3,C5   | -0.34 | -0.99 | VCI-C1,H10  | -0.21 | -0.88 |
| Eintra-C3   | -0.45 | -0.99 | Eintra-C1   | -0.22 | -0.46 |
| VxC-O15,F16 | -0.47 | -0.94 | VxC-C1,H9   | -0.25 | -0.96 |
| VxC-C4,C5   | -0.48 | -0.99 | VxC-H11,F16 | -0.26 | -1.00 |
| VCI-C2,O15  | -0.50 | -1.00 | VxC-C3,C4   | -0.26 | -0.98 |
| VCI-C5,H9   | -0.62 | -0.98 | VxC-C5,H13  | -0.28 | -1.00 |
| VCI-C5,F16  | -0.71 | -0.55 | VCI-H9,O15  | -0.32 | -0.88 |
| VCI-C1,H9   | -0.75 | -0.99 | VxC-C5,O15  | -0.47 | -0.88 |
| VCI-C5,H13  | -0.78 | -0.96 | VCI-H13,O15 | -0.51 | -0.97 |
| VCI-C1,O15  | -0.91 | -0.65 | VCI-C1,C5   | -0.59 | -0.99 |
| VCI-C1,C5   | -1.03 | -0.88 | Eintra-C5   | -1.27 | -0.97 |
| Eintra-O15  | -1.11 | -0.99 | Eintra-F16  | -1.39 | -0.95 |
| VxC-C1,C2   | -1.76 | -1.00 | VCI-C5,O15  | -3.34 | -0.93 |
